# Supplementary material for: The Impact of COVID-19 on the Service of Emergency Department
Source: MDPI journal article supplement (doi:10.3390/healthcare9101295), 2021-09-29
Supplement: s1 [file s1]

**Supplementary Material: Table S1. Triage observation checklist**

|   | Patient information |                                                                    |                                                                                                         |                                                                                       |                                                                                         | Assessor work experience                                                                                               | Arrival - triage to examination time |                       |                                 | Delay                                                       | Notes        |
|---|---------------------|--------------------------------------------------------------------|---------------------------------------------------------------------------------------------------------|---------------------------------------------------------------------------------------|-----------------------------------------------------------------------------------------|------------------------------------------------------------------------------------------------------------------------|--------------------------------------|-----------------------|---------------------------------|-------------------------------------------------------------|--------------|
| 1 | Age<br>...<br>...   | Gender<br><input type="checkbox"/> F<br><input type="checkbox"/> M | Social status<br><input type="checkbox"/> M<br><input type="checkbox"/> S<br><input type="checkbox"/> D | Patient nationality<br><input type="checkbox"/> Saudi<br><input type="checkbox"/> Non | Resident place [In Taif]<br><input type="checkbox"/> Yes<br><input type="checkbox"/> No | Assessor experience<br><input type="checkbox"/> <5<br><input type="checkbox"/> 5 to 10<br><input type="checkbox"/> >10 | Patient arrival time:                | Patient triaged time: | Patient seen by physician time: | <input type="checkbox"/> Yes<br><input type="checkbox"/> No | If yes, why: |
| 2 | Age<br>...<br>...   | Gender<br><input type="checkbox"/> F<br><input type="checkbox"/> M | Social status<br><input type="checkbox"/> M<br><input type="checkbox"/> S<br><input type="checkbox"/> D | Patient nationality<br><input type="checkbox"/> Saudi<br><input type="checkbox"/> Non | Resident place [In Taif]<br><input type="checkbox"/> Yes<br><input type="checkbox"/> No | Assessor experience<br><input type="checkbox"/> <5<br><input type="checkbox"/> 5 to 10<br><input type="checkbox"/> >10 | Patient arrival time:                | Patient triaged time: | Physicians' examination time:   | <input type="checkbox"/> Yes<br><input type="checkbox"/> No | If yes, why: |
| 3 | Age<br>...<br>...   | Gender<br><input type="checkbox"/> F<br><input type="checkbox"/> M | Social status<br><input type="checkbox"/> M<br><input type="checkbox"/> S<br><input type="checkbox"/> D | Patient nationality<br><input type="checkbox"/> Saudi<br><input type="checkbox"/> Non | Resident place [In Taif]<br><input type="checkbox"/> Yes<br><input type="checkbox"/> No | Assessor experience<br><input type="checkbox"/> <5<br><input type="checkbox"/> 5 to 10<br><input type="checkbox"/> >10 | Patient arrival time:                | Patient triaged time: | Physicians' examination time:   | <input type="checkbox"/> Yes<br><input type="checkbox"/> No | If yes, why: |
| 4 | Age<br>...<br>...   | Gender<br><input type="checkbox"/> F<br><input type="checkbox"/> M | Social status<br><input type="checkbox"/> M<br><input type="checkbox"/> S<br><input type="checkbox"/> D | Patient nationality<br><input type="checkbox"/> Saudi<br><input type="checkbox"/> Non | Resident place [In Taif]<br><input type="checkbox"/> Yes<br><input type="checkbox"/> No | Assessor experience<br><input type="checkbox"/> <5<br><input type="checkbox"/> 5 to 10<br><input type="checkbox"/> >10 | Patient arrival time:                | Patient triaged time: | Physicians' examination time:   | <input type="checkbox"/> Yes<br><input type="checkbox"/> No | If yes, why: |
| 5 | Age<br>...<br>...   | Gender<br><input type="checkbox"/> F<br><input type="checkbox"/> M | Social status<br><input type="checkbox"/> M<br><input type="checkbox"/> S<br><input type="checkbox"/> D | Patient nationality<br><input type="checkbox"/> Saudi<br><input type="checkbox"/> Non | Resident place [In Taif]<br><input type="checkbox"/> Yes<br><input type="checkbox"/> No | Assessor experience<br><input type="checkbox"/> <5<br><input type="checkbox"/> 5 to 10<br><input type="checkbox"/> >10 | Patient arrival time:                | Patient triaged time: | Physicians' examination time:   | <input type="checkbox"/> Yes<br><input type="checkbox"/> No | If yes, why: |
| 6 | Age<br>...<br>...   | Gender<br><input type="checkbox"/> F<br><input type="checkbox"/> M | Social status<br><input type="checkbox"/> M<br><input type="checkbox"/> S<br><input type="checkbox"/> D | Patient nationality<br><input type="checkbox"/> Saudi<br><input type="checkbox"/> Non | Resident place [In Taif]<br><input type="checkbox"/> Yes<br><input type="checkbox"/> No | Assessor experience<br><input type="checkbox"/> <5<br><input type="checkbox"/> 5 to 10<br><input type="checkbox"/> >10 | Patient arrival time:                | Patient triaged time: | Physicians' examination time:   | <input type="checkbox"/> Yes<br><input type="checkbox"/> No | If yes, why: |
| 7 | Age<br>...<br>...   | Gender<br><input type="checkbox"/> F<br><input type="checkbox"/> M | Social status<br><input type="checkbox"/> M<br><input type="checkbox"/> S<br><input type="checkbox"/> D | Patient nationality<br><input type="checkbox"/> Saudi<br><input type="checkbox"/> Non | Resident place [In Taif]<br><input type="checkbox"/> Yes<br><input type="checkbox"/> No | Assessor experience<br><input type="checkbox"/> <5<br><input type="checkbox"/> 5 to 10<br><input type="checkbox"/> >10 | Patient arrival time:                | Patient triaged time: | Physicians' examination time:   | <input type="checkbox"/> Yes<br><input type="checkbox"/> No | If yes, why: |
| 8 | Age<br>...<br>...   | Gender<br><input type="checkbox"/> F<br><input type="checkbox"/> M | Social status<br><input type="checkbox"/> M<br><input type="checkbox"/> S<br><input type="checkbox"/> D | Patient nationality<br><input type="checkbox"/> Saudi<br><input type="checkbox"/> Non | Resident place [In Taif]<br><input type="checkbox"/> Yes<br><input type="checkbox"/> No | Assessor experience<br><input type="checkbox"/> <5<br><input type="checkbox"/> 5 to 10<br><input type="checkbox"/> >10 | Patient arrival time:                | Patient triaged time: | Physicians' examination time:   | <input type="checkbox"/> Yes<br><input type="checkbox"/> No | If yes, why: |
